# Supplementary material
Source: PubMed Central journal article supplement (PMC2847531)

## SUPPLEMENTAL FIGURE LEGENDS

**Figure S1.** Low doses of Mn induce the degradation of GPP130 in HeLa and AF-5 cells.

**A.** HeLa cells were treated with 100  $\mu$ M MnCl<sub>2</sub> for 4 h or left untreated. Cells were then co-immunostained to detect giantin and GPP130. Scale bar, 10  $\mu$ m.

**B.** Immunoblot analyses showing that treatment of AF-5 cells with 100  $\mu$ M MnCl<sub>2</sub> induces degradation of GPP130. This degradation was blocked when cells were treated with MnCl<sub>2</sub> and chloroquine (100  $\mu$ M) simultaneously.

**Figure S2.** GPP130 is present inside the lumen of Rab5 Q79L-induced giant MVBs while EEA1 is present on the limiting membrane.

HeLa cells, transfected with Rab5 Q79L-GFP and treated with 500  $\mu$ M MnCl<sub>2</sub> for 4 h, were co-immunostained to detect GPP130 and EEA1. Scale bar, 10  $\mu$ m, inset 2.5X.

**Figure S3.** Dominant negative Dynamin II does not inhibit the degradation of GPP130.

**A.** HeLa cells were transfected with HA-tagged Dyn II WT or Dyn II K44A and 24 h post transfection were either treated with 500  $\mu$ M MnCl<sub>2</sub> for 8 h or left untreated. The cells were then fixed and stained using anti-GPP130 and anti-HA antibodies. Scale bar, 10  $\mu$ m.

**B.** Quantitation of mean GPP130 fluorescence per cell with GPP130 levels in the absence of Mn as 100% (mean  $\pm$  SE, n > 12 cells at each time point,  $p$  > 0.05).

**C.** HeLa cells transfected with Dyn II WT or Dyn II K44A were loaded with fluorescent EGF for 15 min and subsequently fixed, stained and imaged to detect HA and GFP. Asterisks indicate transfected cells in the K44A panels. These did not endocytose EGF whereas neighboring nontransfected cells did. Scale bar, 10  $\mu$ m.

**D.** Quantitation of the mean EGF fluorescence per cell with levels in Dyn II WT expressing cells normalized to 100% (mean  $\pm$  SE, n > 20 cells for each construct,  $p$  < 0.05).

**Figure S4.** Dominant negative Rab5 does not affect Mn-induced degradation of GPP130.

**A.** HeLa cells were transfected with GFP-tagged Rab5 WT or Rab5 S34N and 24 h post transfection they were treated with 500  $\mu$ M MnCl<sub>2</sub> for 8 h or left untreated. Cells were then fixed, stained and imaged to detect GPP130 and GFP. Scale bar, 10  $\mu$ m.

**B.** Quantitation of mean GPP130 fluorescence per cell with levels in the absence of Mn expressed as 100% (mean  $\pm$  SE,  $n > 12$  cells at each time point,  $p > 0.05$ ).

**C.** HeLa cells were transfected with Rab5 WT or Rab5 S34N and 24 h post transfection the EGF degradation assay was performed. Asterisks indicate cells expressing Rab5 S34N, which yielded lower, but still evident, levels due to Rab5 S34N being cytoplasmic and hence extracted during the saponin permeabilization step of the EGF degradation assay. Scale bar, 10  $\mu$ m.

**D.** Quantitation of the mean EGF fluorescence per cell with levels at time 0 set to 100% (mean  $\pm$  SE,  $n > 12$  cells per construct per time point,  $p < 0.05$ ).

**Figure S5.** Dominant negative Rab7 blocks the degradation of fluorescently labeled EGF.

**A.** HeLa cells were transfected with Rab7 WT and Rab7 T22N. Twenty four hours post transfection the EGF-degradation assay was performed. Scale bar, 10  $\mu$ m.

**B.** Quantitation of the mean EGF fluorescence per cell with levels at time 0 normalized to 100% (mean  $\pm$  SE,  $n > 12$  cells per construct per time point,  $p < 0.05$ ).

**Figure S6.** Cytoplasmic domain of GPP130 is not required for its internalization into Rab5 Q79L-induced giant MVBs.

HeLa cells were cotransfected with Rab5 Q79L $\Delta$ GFP and GPP130 $\Delta$ 2-11-GFP, treated with Mn for 4 h and were processed to detect GFP and EEA1. Scale bar, 10  $\mu$ m; inset 2.5X.

**Figure S7. GFP-tagged GPP130 constructs with deletions in the stem domain are targeted to the Golgi.**

HeLa cells were transfected with the indicated stem-deleted constructs, treated with cycloheximide for 4 h and processed to detect GPP130 and GFP. Scale bar, 10  $\mu$ m.

**Figure S8. GPP130 $\Delta$ 88-247-GFP remains Golgi localized after 8 h of treatment with Mn.**

HeLa cells were siRNA-transfected to knock down endogenous GPP130. After two days the cells were re-transfected with an RNAi-immune GPP130<sub>1-247</sub>-GFP and GPP130 $\Delta$ 88-247-GFP. Twenty four hours later cells were treated with 500  $\mu$ M MnCl<sub>2</sub> for 8 h or left untreated. Cells were then fixed and imaged to detect endogenous GPP130 (using anti-GPP130 mAb against

acidic domain) and GFP. The cells shown in the panels in this figure had no detectable endogenous GPP130. Scale bar, 10  $\mu\text{m}$ .

**A.****Control****Mn (100  $\mu$ M)****GPP130**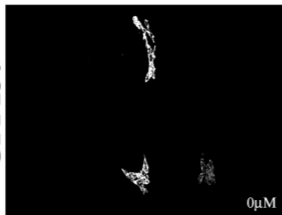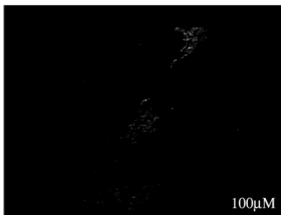**Giantin**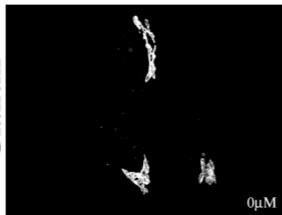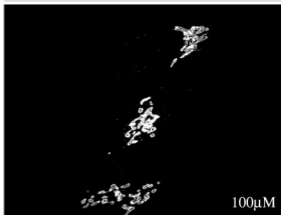**B.****AF5 Cells**

|             |   |   |   |   |
|-------------|---|---|---|---|
| <b>Chlq</b> | - | - | + | + |
| <b>Mn</b>   | - | + | - | + |

**GPP130**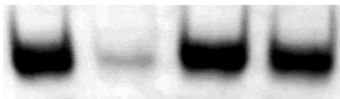

**Rab5 Q79L/ GPP130/ EEA1**

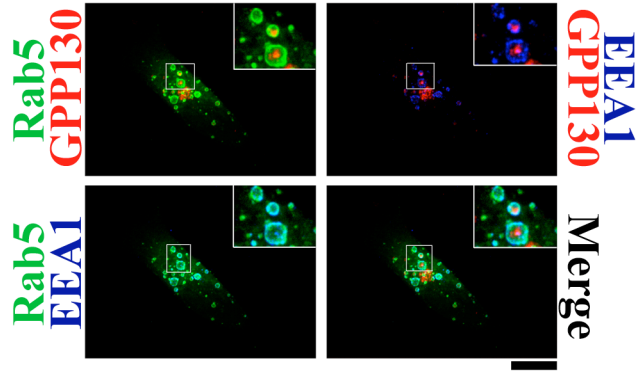

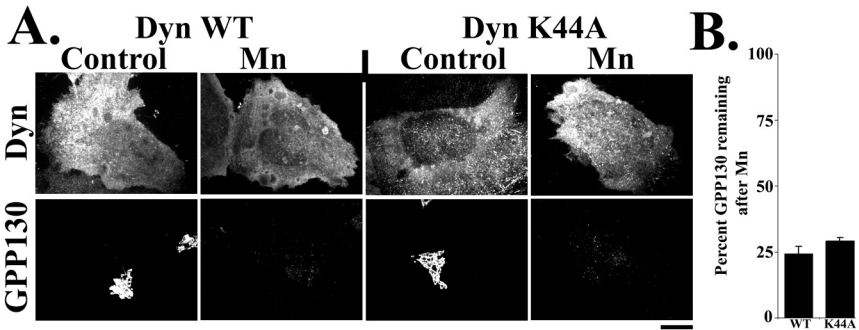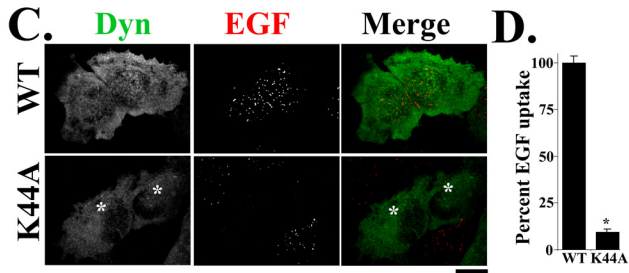

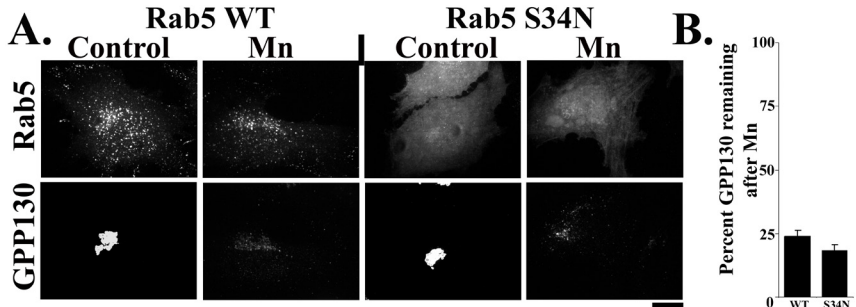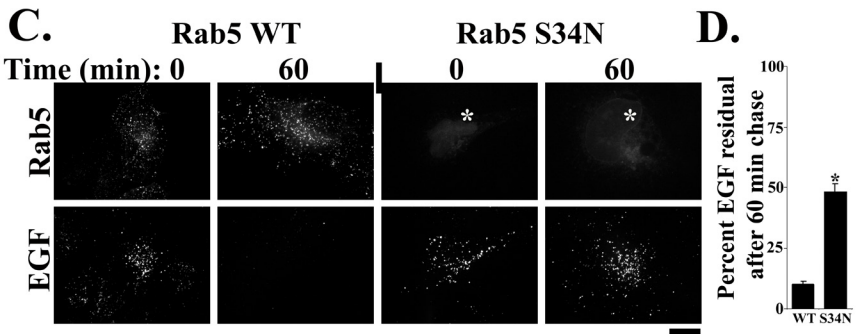

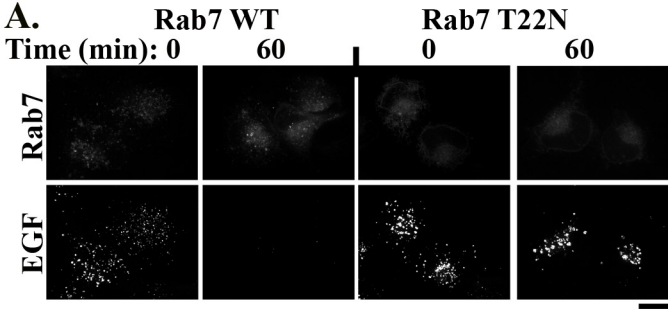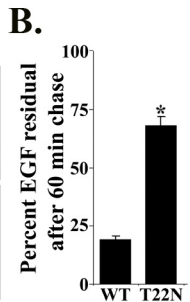



$\Delta 2-11$  GFP

EEA1

Merge

Min

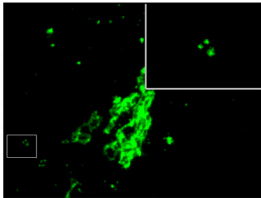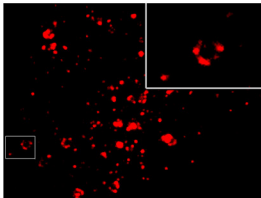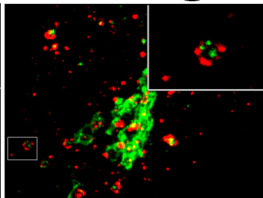

**GFP****GPP130** $\Delta 88-247$ 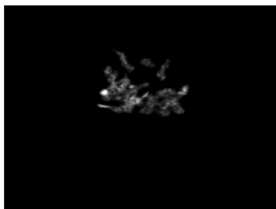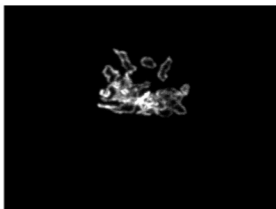 $\Delta 36-175$ 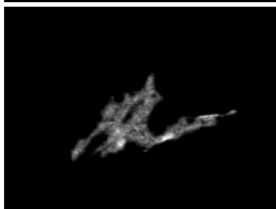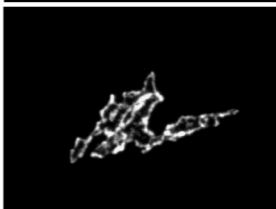 $\Delta 176-247$ 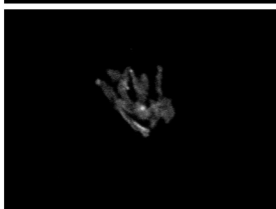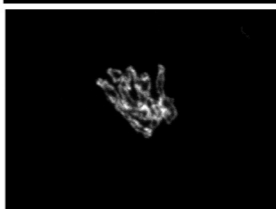 $\Delta 36-87$ 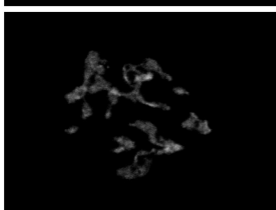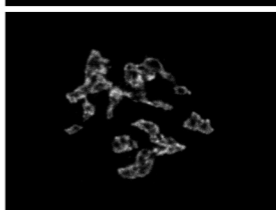 $\Delta 88-175$ 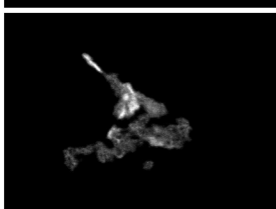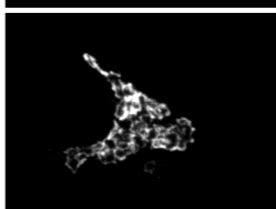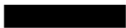

**Control**

**Mn (8 h)**

**1-247**

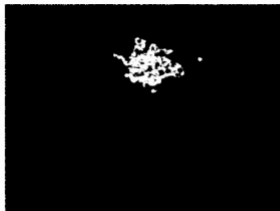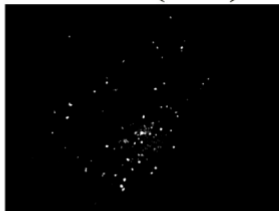

**$\Delta 88-247$**

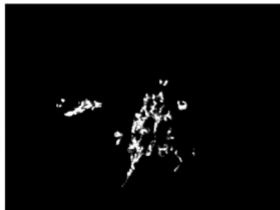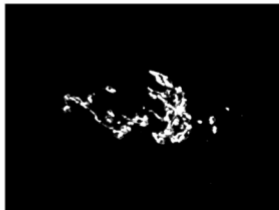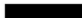

Supplement: E09-11-0985_1.pdf [file E09-11-0985_1.pdf]
